# Supplementary material
Source: PubMed Central journal article supplement (PMC10576238)

---

**Supplementary information**

---

**A cross-species proteomic map reveals  
neoteny of human synapse development**

---

In the format provided by the  
authors and unedited

## SI Guide

### **A cross-species proteomic map reveals neoteny of human synapse development**

Li Wang<sup>1,2\*</sup>, Kaifang Pang<sup>3,4</sup>, Li Zhou<sup>1,2</sup>, Arantxa Cebrián-Silla<sup>1,5</sup>, Susana González-Granero<sup>6</sup>, Shaohui Wang<sup>1,2</sup>, Qiuli Bi<sup>1,2</sup>, Matthew L. White<sup>1,2</sup>, Brandon Ho<sup>1,2</sup>, Jiani Li<sup>7</sup>, Tao Li<sup>1</sup>, Yonatan Perez<sup>1,2</sup>, Eric J. Huang<sup>8</sup>, Ethan A. Winkler<sup>5</sup>, Mercedes F. Paredes<sup>1,2</sup>, Rothem Kovner<sup>9</sup>, Nenad Sestan<sup>9</sup>, Alex A. Pollen<sup>1,2</sup>, Pengyuan Liu<sup>10</sup>, Jingjing Li<sup>1,2</sup>, Xianhua Piao<sup>1,11,12</sup>, José Manuel García-Verdugo<sup>6</sup>, Arturo Alvarez-Buylla<sup>1,5</sup>, Zhandong Liu<sup>3,4</sup>, Arnold R. Kriegstein<sup>1,2\*</sup>

<sup>1</sup>The Eli and Edythe Broad Center of Regeneration Medicine and Stem Cell Research, University of California San Francisco; San Francisco, CA 94143, USA.

<sup>2</sup>Department of Neurology, University of California San Francisco; San Francisco, CA 94143, USA.

<sup>3</sup>Jan and Dan Duncan Neurological Research Institute at Texas Children's Hospital; Houston, Texas 77030, USA.

<sup>4</sup>Department of Pediatrics, Baylor College of Medicine; Houston, Texas 77030, USA.

<sup>5</sup>Department of Neurological Surgery, University of California San Francisco; San Francisco, CA 94143, USA.

<sup>6</sup>Laboratory of Comparative Neurobiology, Cavanilles Institute of Biodiversity and Evolutionary Biology, University of Valencia and CIBERNED; Valencia, Spain.

<sup>7</sup>Gilead Sciences, Foster City, CA 94404, USA.

<sup>8</sup>Department of Pathology, University of California San Francisco; San Francisco, CA 94143, USA.

<sup>9</sup>Department of Neuroscience, Yale School of Medicine, New Haven, CT 06520, USA

<sup>10</sup>Department of Chemistry, University of Massachusetts Lowell; Lowell, MA 01854, USA.

<sup>11</sup>Division of Neonatology, Department of Pediatrics, University of California San Francisco; San Francisco, CA 94158, USA.

<sup>12</sup>Newborn Brain Research Institute, University of California San Francisco; San Francisco, CA 94158, USA.

\*Corresponding author. e-mail: Li.Wang@ucsf.edu; Arnold.Kriegstein@ucsf.edu.

**SI Figure 1 | Uncropped immunoblots from Extended Data Fig. 1a,c and Extended Data Fig. 8a.**

**SI Figure 2 | Uncropped immunoblots from Extended Data Fig. 8b–d.**

**Supplementary Table 1 | Metadata of the human brain samples used in this study.**

**Supplementary Table 2 | PSD protein abundance and pathway enrichment in the developing human cortex.**

**Supplementary Table 3 | PSD modules and their pathway enrichment.**

**Supplementary Table 4 | Protein domains in PSD proteins.**

**Supplementary Table 5 | PSD protein abundance and pathway enrichment in the developing human primary visual cortex.**

**Supplementary Table 6 | Transcription of PSD proteins and its regulation.**

**Supplementary Table 7 | Cell type-specific transcription of PSD proteins.**

**Supplementary Table 8 | Metadata of the macaque and mouse brain samples used in this study.**

**Supplementary Table 9 | PSD protein abundance and pathway enrichment in the developing macaque cortex.**

**Supplementary Table 10 | PSD protein abundance and pathway enrichment in the developing mouse cortex.**

**Supplementary Table 11 | Comparison of PSD development among three species.**

**Supplementary Table 12 | ShRNA and quantitative RT-PCR primer sequences.**

**Supplementary Table 13 | Association of human PSD modules with cognitive functions and brain disorders.**



SI Figure 2

Extended Data Fig. 8b

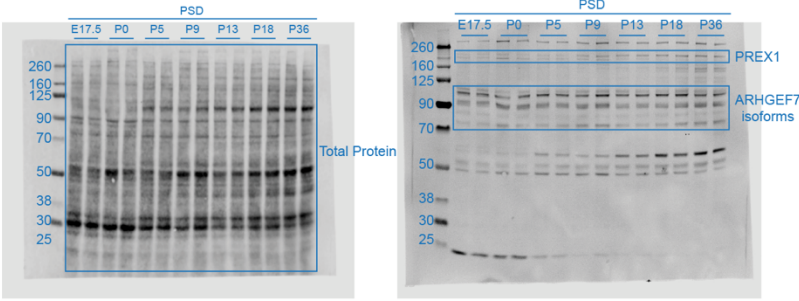

Extended Data Fig. 8c

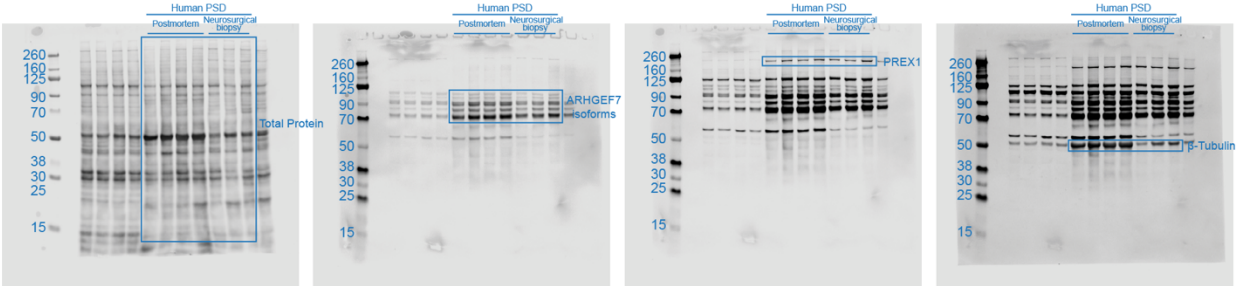

Extended Data Fig. 8d

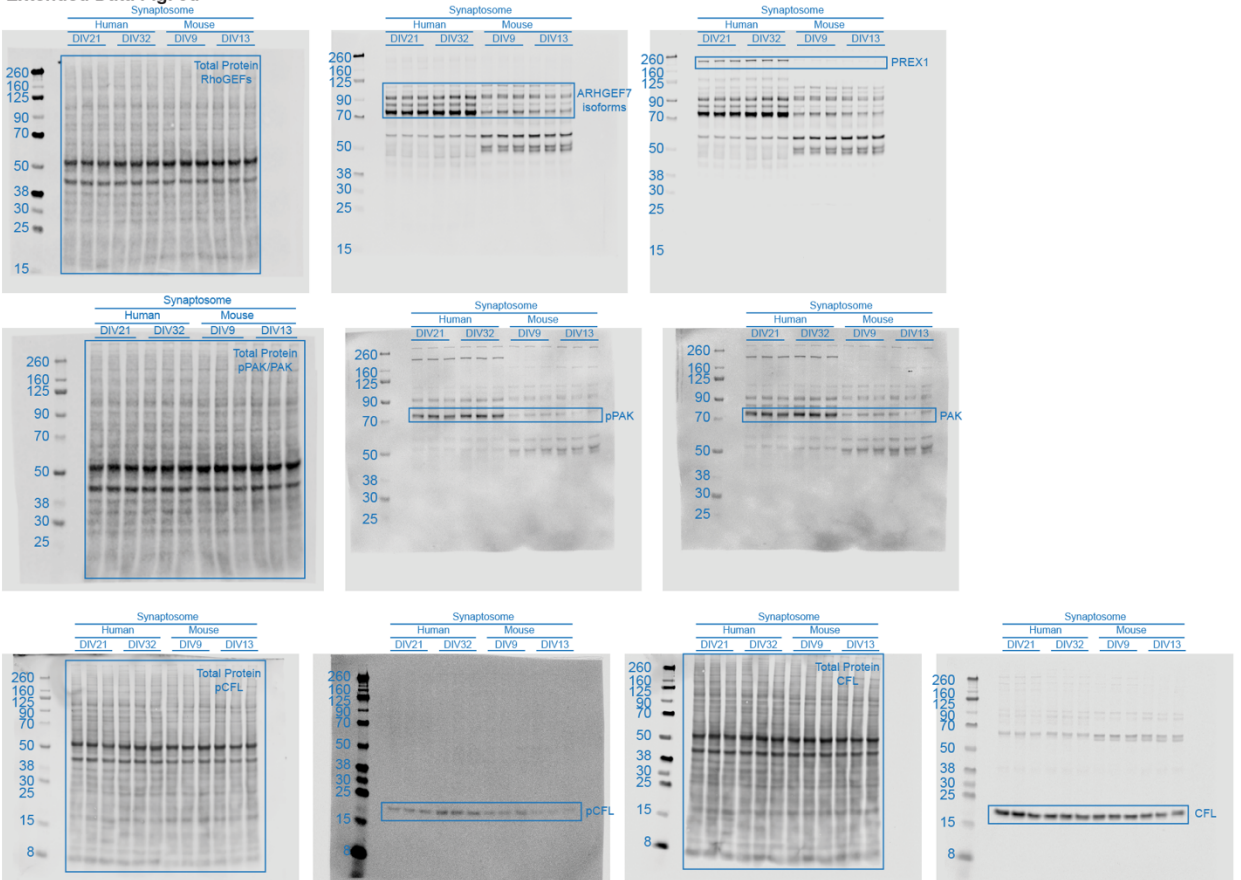

Supplement: NIHMS1934863-supplement-Wang_et_al_supplementary_info.pdf [file NIHMS1934863-supplement-Wang_et_al_supplementary_info.pdf]
